# Supplementary material
Source: Springer Nature journal article supplement (https://www.springermedizin.de/resource/supplementary/12911_2013_758_MOESM2_ESM.pdf/9526586)
Supplement: MOESM2 [file 9526586]

**Table S1. Summaries of patient decision support implementation studies: aims, implementation strategies, outcomes**

| <p><b>Author, year, study citation, country.</b></p> <p><b>Setting: study type.</b></p> <p><b>Funding.</b></p>                                            | <p><b>Study aims. Conceptual framework.</b></p>                                                                                                                      | <p><b>Intervention and implementation strategy.</b></p> <p><b>Study duration.</b></p>                                                                                                                                                                                                                                | <p><b>Implementation and provider outcomes.</b></p>                                                                                                                                                                                                                                                                                                                  |
|-----------------------------------------------------------------------------------------------------------------------------------------------------------|----------------------------------------------------------------------------------------------------------------------------------------------------------------------|----------------------------------------------------------------------------------------------------------------------------------------------------------------------------------------------------------------------------------------------------------------------------------------------------------------------|----------------------------------------------------------------------------------------------------------------------------------------------------------------------------------------------------------------------------------------------------------------------------------------------------------------------------------------------------------------------|
| <p>Holmes-Rovner, 2000, [1], US.</p> <p>Secondary care hospital: observational study.</p> <p>Funding: Blue Cross and Blue Shield health insurers.</p>     | <p>To determine feasibility of using DESIs in a fee-for-service hospital system (physicians' offices and in-patient facilities).</p> <p>Framework: nil reported.</p> | <p>Invited hospitals in Michigan to participate in evaluation of DESI implementation. 5 hospitals selected based on interest, physician leadership, patient volumes, and evidence of supportive staff and systems.</p> <p>8 months: pilot October–December 1996; initial implementation period January–May 1997.</p> | <p>Estimated potential eligible patients across all sites per year: 1319 breast cancer, 1222 ischemic heart disease. Use of DESIs was lower than anticipated: 25 patients referred over 7 months in 3 hospitals; 4 of 27 eligible breast cancer patients referred at one site. Number of eligible and referred patients not reported for ischemic heart disease.</p> |
| <p>Stapleton, 2002, [2], UK.</p> <p>Secondary care maternity units: quasi-experimental and observational study.</p> <p>Funding: Department of Health.</p> | <p>To evaluate use and impact of evidence-based leaflets on informed choice in maternity services.</p> <p>Framework: nil reported.</p>                               | <p>13 maternity units allocated to 10 clusters: 5 intervention clusters that received DESIs (leaflets) were compared to 5 controls.</p> <p>Study duration not reported.</p>                                                                                                                                          | <p>70% of women recruited reported receiving at least one leaflet. Health professionals rarely observed discussing leaflets with patients.</p>                                                                                                                                                                                                                       |
| <p>Stacey, 2005, [3], Canada.</p> <p>Call-centers:</p>                                                                                                    | <p>To evaluate barriers and facilitators influencing provision of decision support by call-center</p>                                                                | <p>Using simulated callers, evaluated performance of call-center nursing staff introduced to patient decision support. A survey, semi-structured</p>                                                                                                                                                                 | <p>99 nurses were approached and 30 consented to undertake evaluation by simulated calls. During these calls, 28 nurses used decision support to</p>                                                                                                                                                                                                                 |

|                                                                                                                                         |                                                                                                                                                                                                 |                                                                                                                                                                                                                                                              |                                                                                                                                                                                                                              |
|-----------------------------------------------------------------------------------------------------------------------------------------|-------------------------------------------------------------------------------------------------------------------------------------------------------------------------------------------------|--------------------------------------------------------------------------------------------------------------------------------------------------------------------------------------------------------------------------------------------------------------|------------------------------------------------------------------------------------------------------------------------------------------------------------------------------------------------------------------------------|
| <p>observational study.</p> <p>Funding: sources related to Canada research Chair.</p>                                                   | <p>nurses.</p> <p>Framework: Ottawa model of research use and Ottawa Decision Support.</p>                                                                                                      | <p>interviews, and focus groups were used to collect data.</p> <p>2 months: December 2003–January 2004.</p>                                                                                                                                                  | <p>varying extents.</p>                                                                                                                                                                                                      |
| <p>Silvia, 2006, [4], US.</p> <p>Secondary care oncology: observational study.</p> <p>Funding: IMDF.</p>                                | <p>To characterize patterns of use and perceived barriers to implementation in clinical sites that had shown expressed interest in providing patient DESIs.</p> <p>Framework: nil reported.</p> | <p>Convenience samples of 15 US sites identified and informed about availability of DESIs. Each site was sent 10 copies (DVDs). Follow-up interviews scheduled at 6-12 months.</p> <p>DESI's allocated January–August 2003. Total duration not reported.</p> | <p>All 15 sites requested additional DVDs. 6 of 15 sites implemented DESIs and 9 were willing to be interviewed. Patient exposure to the DESI varied. 5 sites reported reaching between 40% to 80% of eligible patients.</p> |
| <p>Stacey, Pomey et al., 2006, [5], Canada.</p> <p>Call-center: case study.</p> <p>Funding: Canadian Institute for Health Research.</p> | <p>To describe and evaluate experience interacting with a nurse-staffed call-center using a decision support protocol.</p> <p>Framework: Ottawa model of research use.</p>                      | <p>Provided online tutorial, skills workshop, provision of a decision support protocol, and feedback on quality of decision support provided to pre-arranged simulated calls.</p> <p>7 months: December 2003–June 2004.</p>                                  | <p>31 nurses received the intervention, 25 responded to a survey. Majority of nurses reported positive future intentions to use decision support protocol. A month after the workshop, 11 of the 25 reported actual use.</p> |
| <p>Stacey, O'Connor et al., 2006, [6], Canada.</p> <p>Call-center: RCT.</p> <p>Funding: Ontario Ministry of Health.</p>                 | <p>To evaluate implementation of decision support and decision coaching in a nurse-led call-center.</p> <p>Framework: nil reported.</p>                                                         | <p>Provided education regarding coaching and skills workshop. Baseline and post-intervention data collected using calls by simulated patients.</p> <p>Second simulated call one month after intervention. Total duration not reported.</p>                   | <p>Compared with controls (n=20), nurses in intervention group (n=21) had greater knowledge and improved decision coaching skills. Provision of decision support did not increase call duration.</p>                         |

## References

- [1] Holmes-Rovner M V, Valade D, Orłowski C, Draus C, Nabozny-Valerio B, Keiser S: **Implementing shared decision-making in routine practice: barriers and opportunities.** *Health Expect* 2000, **3**:182–191.
- [2] Stapleton H, Kirkham M, Thomas G: **Qualitative study of evidence based leaflets in maternity care.** *BMJ* 2002, **324**:639.
- [3] Stacey D, Graham I, O'Connor A, Pomey M: **Barriers and facilitators influencing call center nurses' decision support for callers facing values-sensitive decisions: a mixed methods study.** *Worldv Evid-Based Nu* 2005, **2**:184–195.
- [4] Silvia KA, Sepucha KR: **Decision aids in routine practice: lessons from the breast cancer initiative.** *Health Expect* 2006, **9**:255–264.
- [5] Stacey D, Pomey M, O'Connor A, Graham I: **Adoption and sustainability of decision support for patients facing health decisions: an implementation case study in nursing.** *Implement Sci* 2006, **1**:17.
- [6] Stacey D, O'Connor AM, Graham ID, Pomey MP: **Randomized controlled trial of the effectiveness of an intervention to implement evidence-based patient decision support in a nursing call centre.** *Implement Sci* 2006, **12**:410–415.
